# Supplementary material for: Controlled Release of Chlorogenic Acid from Polyvinyl Alcohol/Poly(γ-Glutamic Acid) Blended Electrospun Nanofiber Mats with Potential Applications in Diabetic Foot Treatment
Source: MDPI journal article supplement (doi:10.3390/polym13172943), 2021-08-31
Supplement: s1 [file s1]

Supporting information

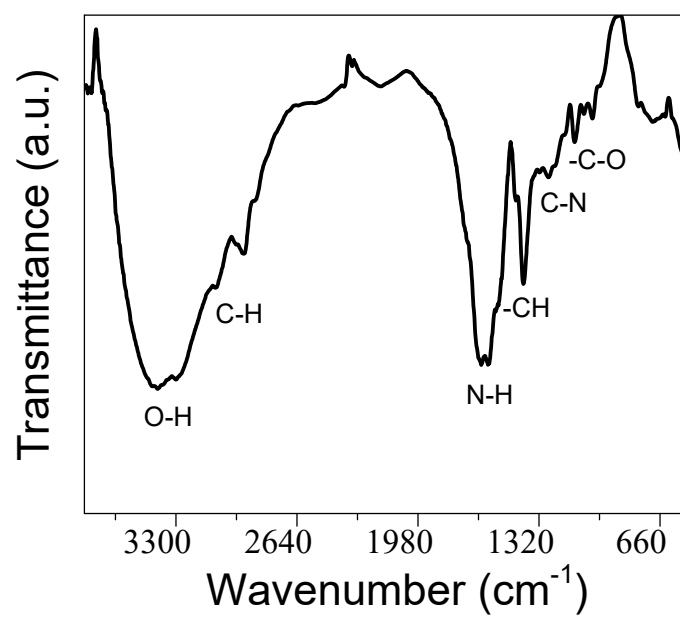

Figure S1. FT-IR spectra of γ-PGA.

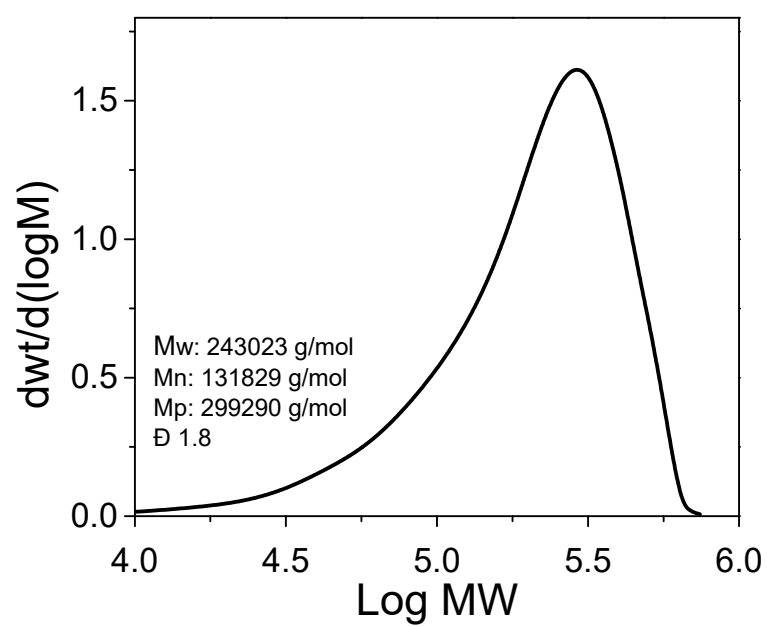

Figure S2. GPC Chromatogram of  $\gamma$ -PGA.

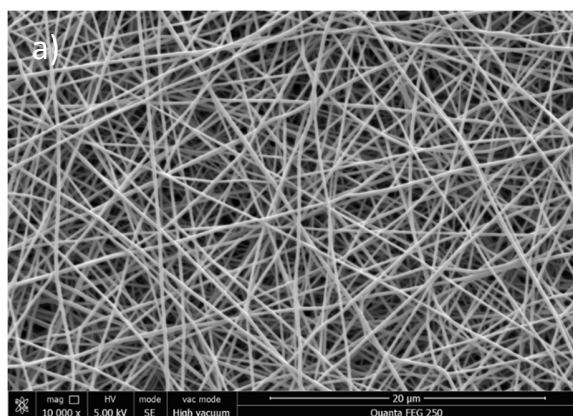

b)

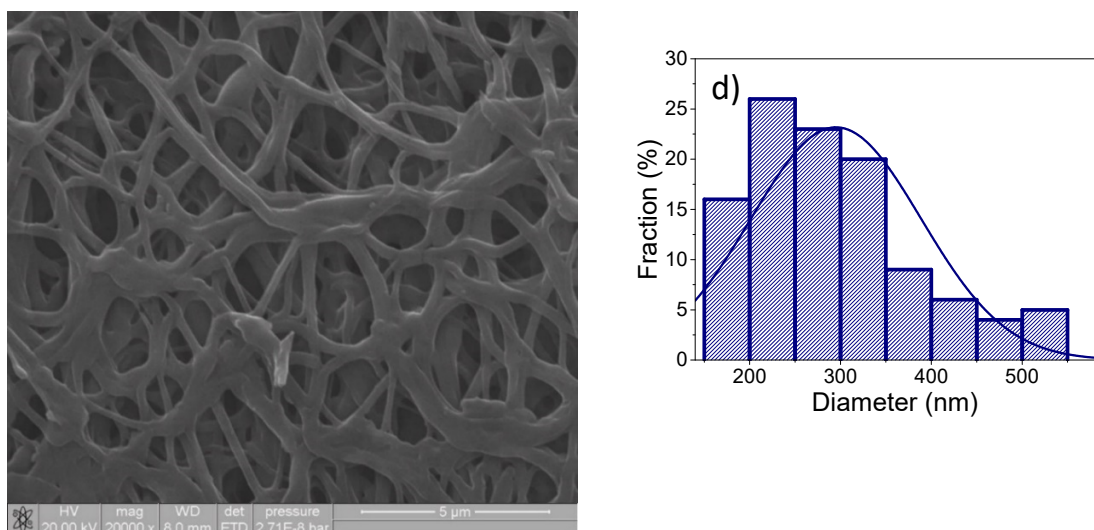

**Figure S3.** SEM micrographs of The PVA nanofiber, obtains by electrospun with and without crosslinking (a) and c), respectively. Diameter size distribution for nanofiber with and without crosslinking (b), d), respectively.

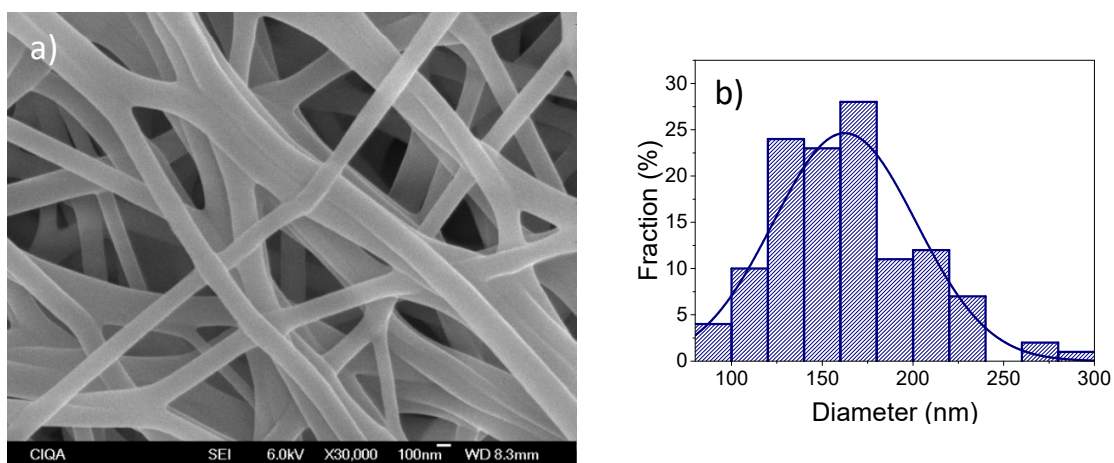

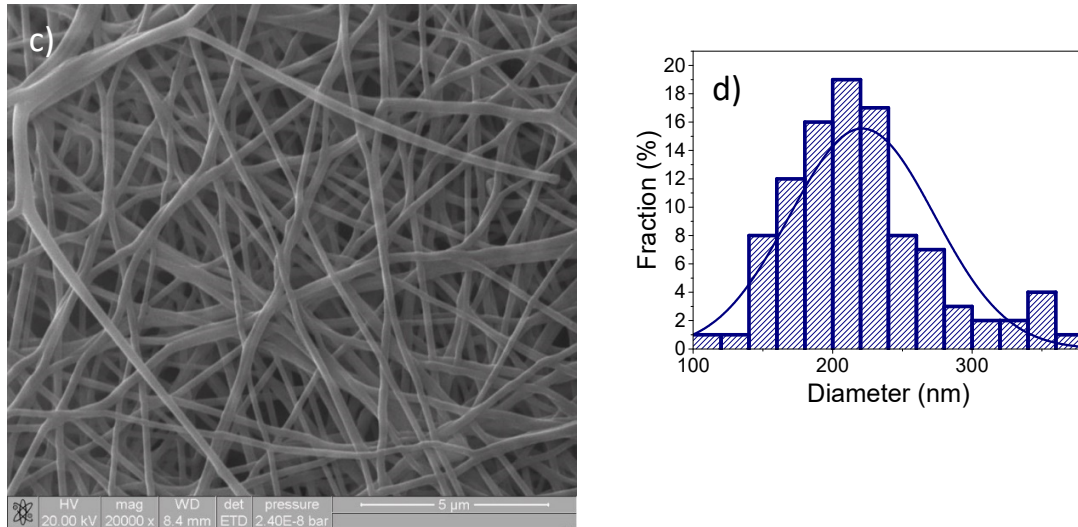

**Figure S4.** SEM micrographs of The PVA/γ-PGA, 5 % nanofiber, obtains by electrospun with and without crosslinking (a) and c), respectively. Diameter size distribution for nanofiber with and without crosslinking (b), d), respectively.

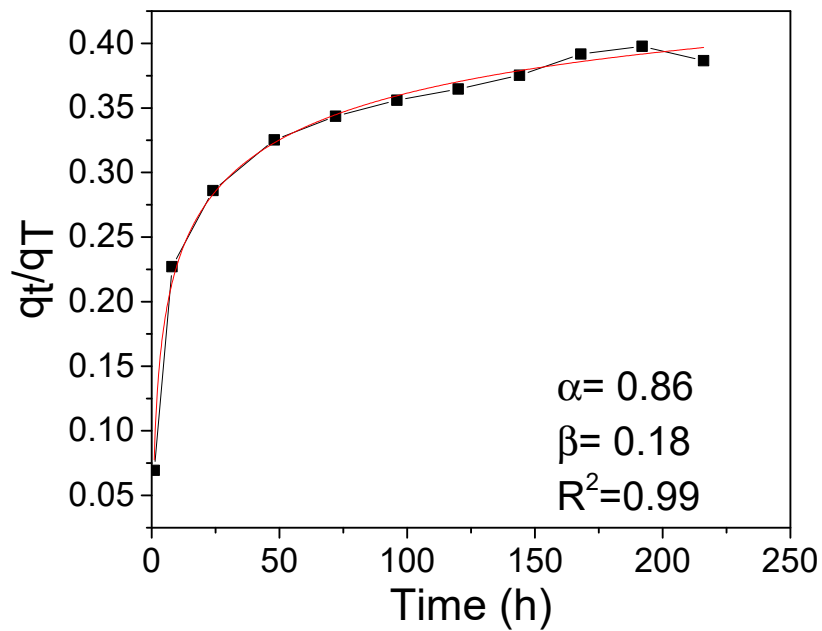

**Figure s5.** Weibull model for PVA.

**Table S1.** Average pore size for PVA, PVA/ $\gamma$ -PGA 5% and PVA/ $\gamma$ -PGA 10 %.

| Sample                | Average (nm)  |
|-----------------------|---------------|
| PVA/ $\gamma$ -PGA 10 | 299 $\pm$ 118 |
| PVA/ $\gamma$ -PGA 5  | 439 $\pm$ 168 |
| PVA                   | 723 $\pm$ 244 |
